# Supplementary material for: Facile synthesis of C30-AuNPs for the effective catalytic reduction of nitrophenols and azo dyes
Source: Royal Society of Chemistry journal article supplement (doi:10.1039/d4nj00233d), 2024-01-01
Supplement: d4nj00233d1.pdf [file d4nj00233d1.pdf]

electronic supplementary information

## Facile synthesis of C30-AuNPs for the effective catalytic

### reduction of nitrophenols and azo dyes

*Weizhen Sun, Luyao Zang, Xia Zhang, Chenqi Zhang, Zhiqing Zhang, Xiufeng Wang,  
Guodong Zhang, Fang Wang, Ting Zhou\**

Department of Chemistry, College of Chemistry and Chemical Engineering, China  
University of Petroleum (East China), Qingdao, 266580, P. R. China

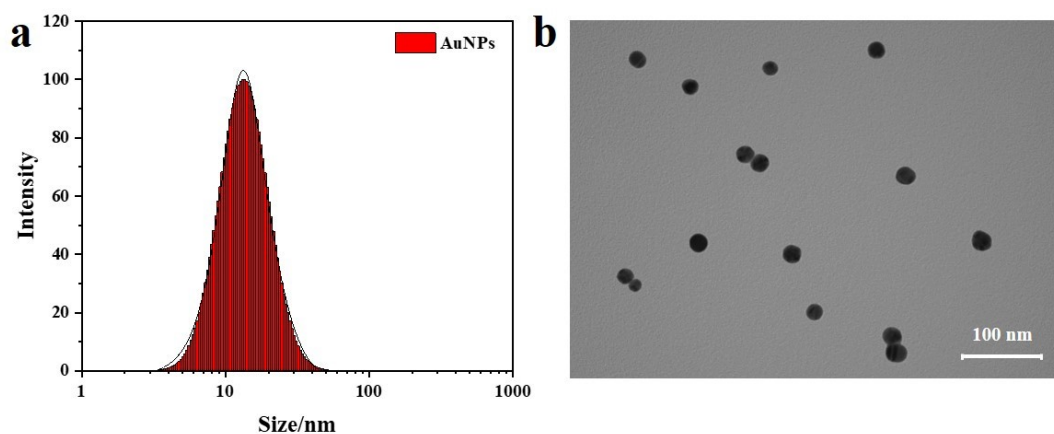

Fig. S1. DLS diagram and TEM image of AuNPs.

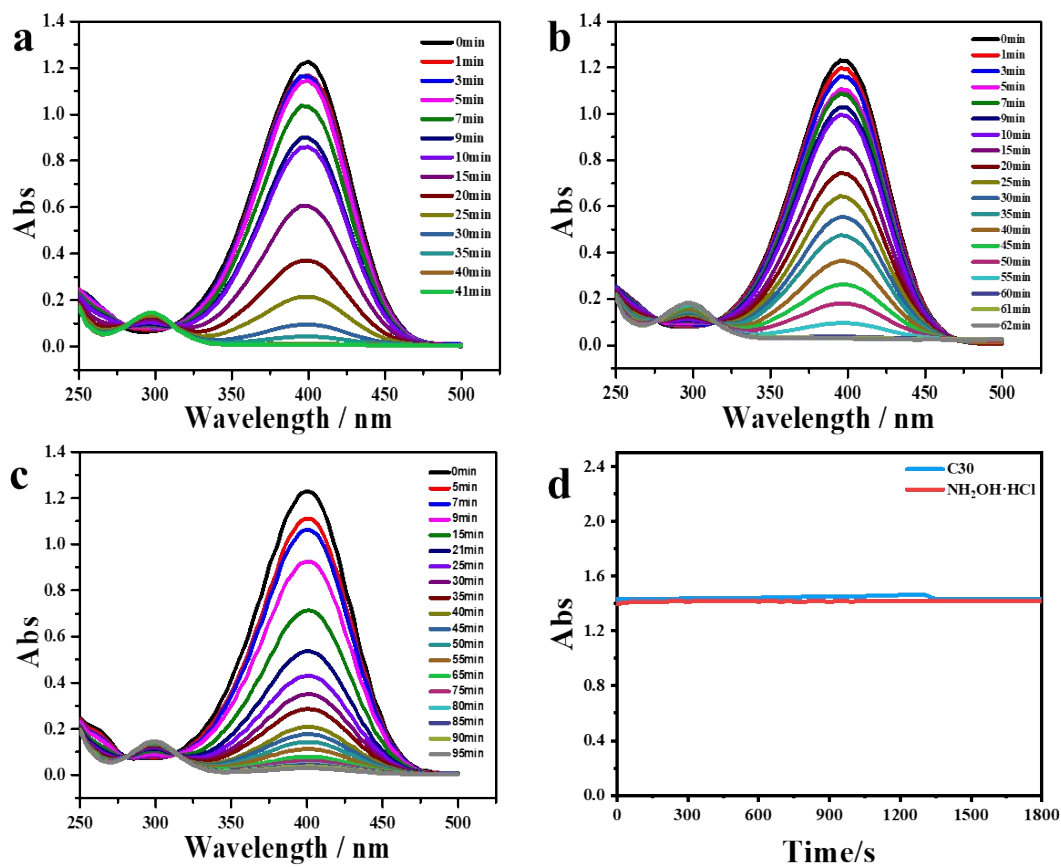

Fig. S2. UV-Vis spectra of the catalytic reduction of 4-NP by (a) AuNPs, (b) A30-AuNPs and (c) C30-AuNPs. (d) The effect of DNA and  $\text{NH}_2\text{OH}\cdot\text{HCl}$  for 4-NP reduction.

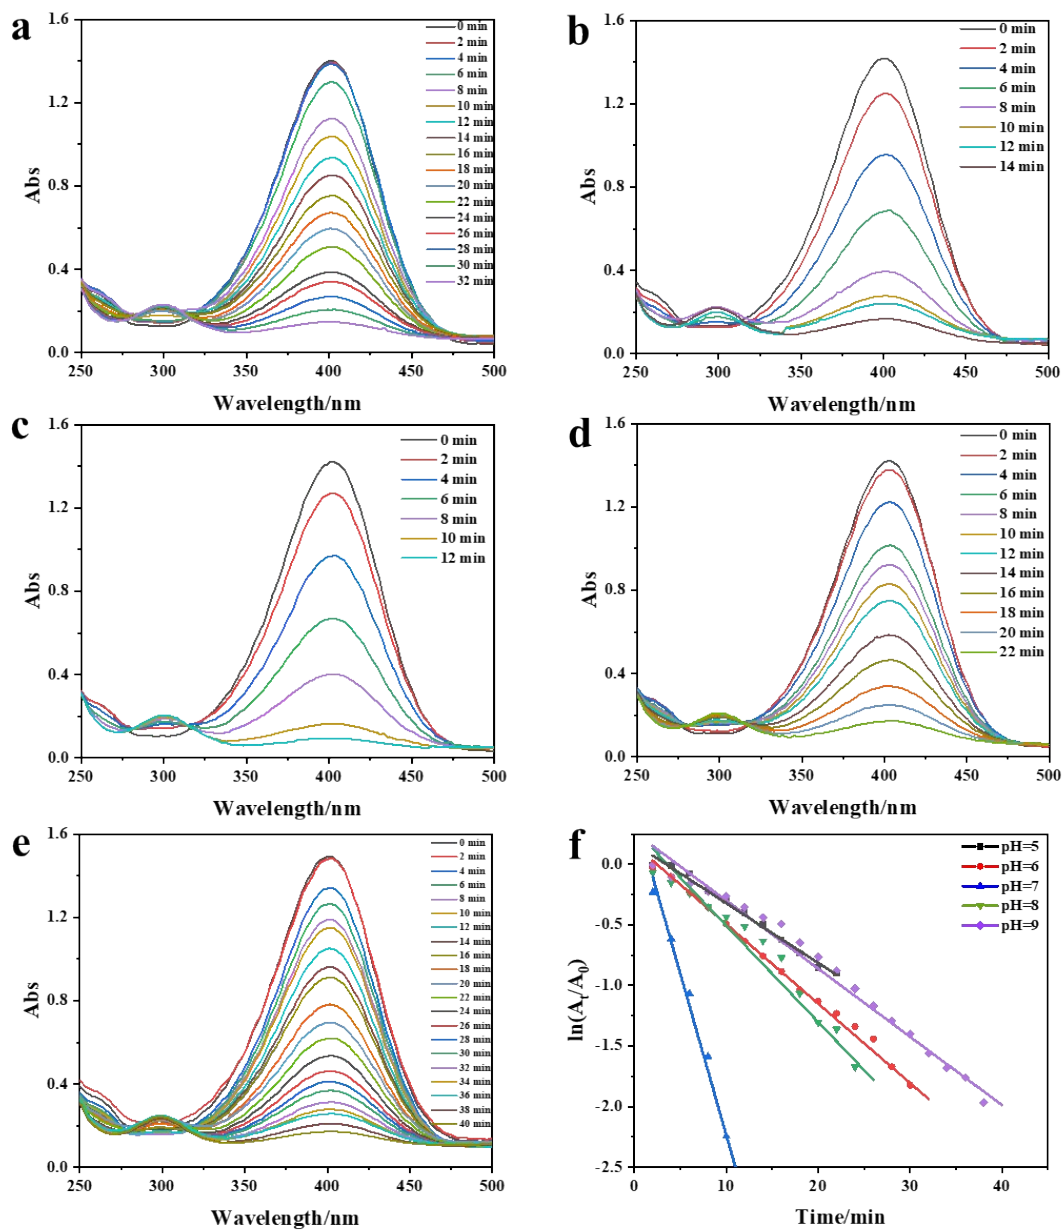

Fig. S3. UV-Vis spectra of the catalytic reduction of 4-NP by C30-AuNP at (a) pH=5, (b) pH=6, (c) pH=7, (d) pH=8, (e) pH=9. (f)  $\ln(A_t/A_0)$  vs. reaction time at different pH values.

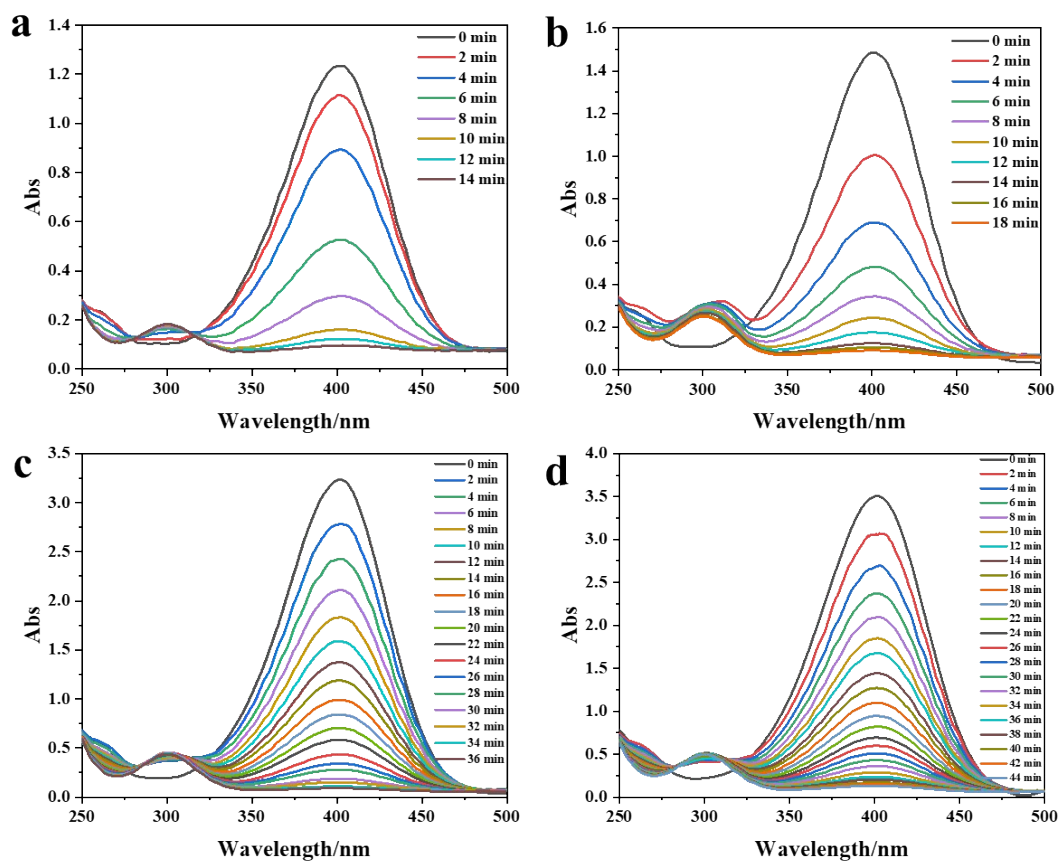

Fig. S4. Diagram of the effect of different concentrations of (a) 4-NP (0.1 mM), (b) 4-NP (0.15 mM), (c) 4-NP (0.2 mM), (d) 4-NP (0.25 mM) on the reaction.

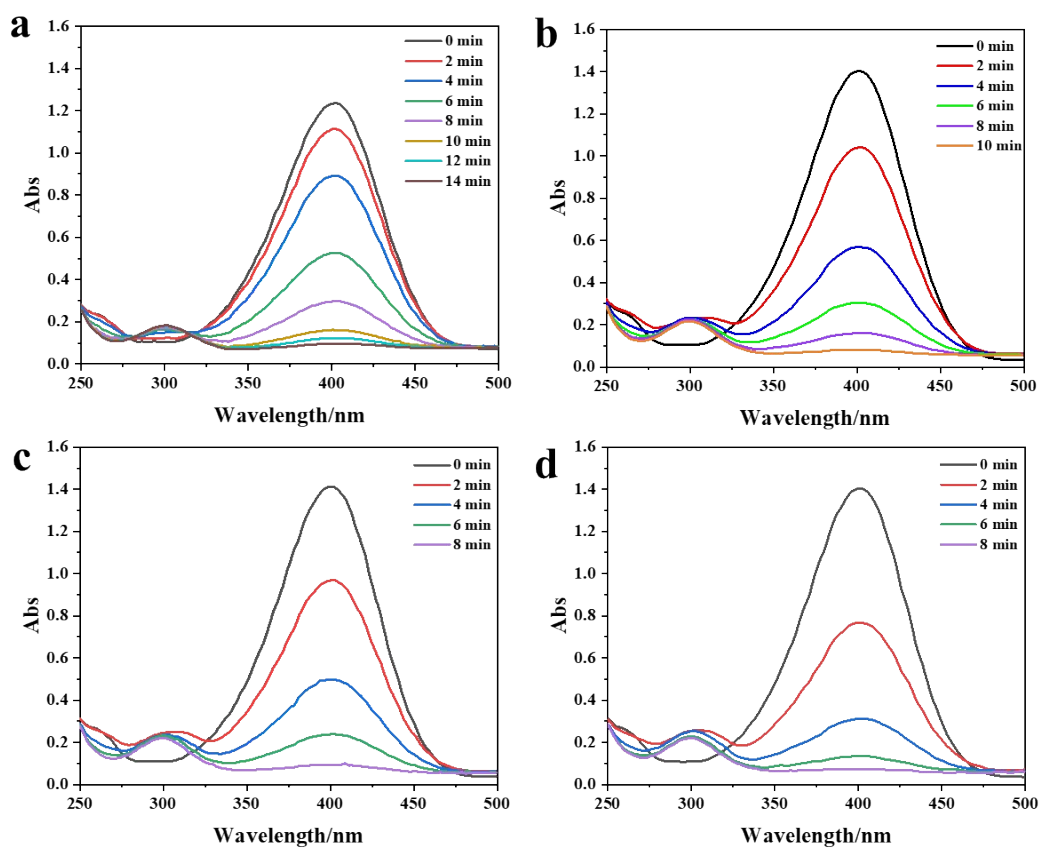

Fig. S5. Diagram of the effect of different concentrations of (a)  $\text{NaBH}_4$  (0.1 M), (b)  $\text{NaBH}_4$  (0.15 M), (c)  $\text{NaBH}_4$  (0.2 M), (d)  $\text{NaBH}_4$  (0.25 M) on the reaction.
